# Supplementary material
Source: PubMed Central journal article supplement (PMC3121502)
Supplement: supp_M111.231068_Testoni.pdf [file supp_M111.231068_Testoni.pdf]

## SUPPLEMENTARY MATERIAL

### Supplementary Experimental Procedures

***IFN $\alpha$ /STAT2 array design.*** Aiming at designing an oligonucleotide-based array containing a large repertoire of genes targeted by IFN- $\alpha/\beta$ , but not IFN- $\gamma$ , we included: a) the few genes already confirmed by ChIP to be direct targets of STAT2 at the time this study was designed (*PKR* and *OAS1*); b) 32 genes identified by ChIP-chip on a DNA microarray of human chromosome 22 as bound by STAT2 and induced by IFN $\alpha$  but not IFN $\gamma$  (18); c) genes whose expression is modulated in response to IFN- $\alpha/\beta$  in microarray-based expression profiling studies (a complete list of references is included in Table S2). The resulting > 300 genes were analyzed by bioinformatics tools (UCSC Genome Browser, Transfac and MacVector) to identify the presence of predicted ISRE binding sequences (consensus: AGTTTN3TTTCC, with >80% conservation) either in their promoter or in the first intron (i.e. a region spanning from -2500 to +1000 respect to tss). After this analysis, a total of 113 putative direct STAT2 target genes were selected for the array design. Selection criteria favored first those promoters confirmed by classical ChIP or ChIP-chip, and then, to those genes that were not ChIP validated we applied a ranking score based on the percentage of ISRE conservation, the position of the ISRE elements (core promoter preferred to upstream regions and upstream regions preferred to first intron), the number of ISRE sites (additional sites in the upstream/intron region besides the core promoter ISRE were preferred). Gene Ontology analysis of the 113 selected genes revealed that many putative IFN $\alpha$  direct target are involved in cellular activities well beyond innate immunity and inflammation with several genes belonging to the GO categories Transcription Regulation and Apoptosis/Proliferation (see Table S2). For each target gene, three different 50mer long oligos were designed (using PrimerQuest <http://eu.idtdna.com/Scitools/Applications/Primerquest/default.aspx>): the first one mapping in the upstream promoter (between -1500 and -500 from tss - Oligo 1), the second one in the proximal promoter (between -500 and +0 - Oligo 2) and the third downstream (between +0 and +1000 - Oligo 3) of the transcription start site (see Table S3). This design allows to have an internal control for every promoter represented. All oligos were spotted in triplicate and the resulting array was printed 4 times on the same slide for a total of 4068 spots. Moreover, 96 positive control and 120 negative control spots were added. Spotting sessions were performed at the Rome Oncogenomic Centre consortium using a MicroGrid II Plus Compact (Genomic Solutions), UltraGAPSTM Coated Slides (Corning) covalently bound coating of Gamma Amino Propyl Silane, Pronto!™ Universal Spotting Solution (Corning, #40025) and MWG 50mer oligonucleotides at 500ng/ $\mu$ l (M-Medical). After crosslinking of the oligos to the slide surface via exposure to UV energy (600mJ), the slides were maintained at room temperature in dry atmosphere.

***Probe generation and microarray hybridization.*** Probe generation was done essentially as previously described in the Whole Genome Amplification Method (25) using 10ng of the Input and the whole ChIP samples. After checking that the specific enrichment on a control promoter was not affected by the amplification step (see Figure S3), ChIP and Input amplicons (1 $\mu$ g each) were labelled with amino-allyl dUTP by random priming using the BioPrime DNA labelling system (Invitrogen, #18094-011) and subsequently coupled to Post Labelling Reactive Dyes (GE Healthcare, #RPN5661). Microarrays were prehybridized for 2 h at 55°C with 100  $\mu$ l of Genisphere Hybridization Buffer (Labogen, #C600V600S25) supplemented with 100 ng/ $\mu$ l Salmon Sperm DNA (Sigma Aldrich). After washing, each array was cohybridized at 55°C for 16 hours with denaturated ChIP Cy5 and Input Cy3 labelled amplicons in a final volume of 110  $\mu$ l of hybridization buffer. Slides were washed twice in 0,1% SDS, 1X SSC (at 55°C and after at room temperature) for 5' shaking, once in 0.2X SSC for 5' at room temperature shaking and, finally, briefly rinsed in H<sub>2</sub>O. Slides were spun dry, scanned and analyzed with a Genepix Professional 4200a Microarray Scanner (Axon Instruments). Each set of hybridizations was repeated three times with different ChIP materials.

## SUPPLEMENTARY FIGURES

**Fig. S1.** *A.* and *B.* Histograms represent how the 339 oligonucleotides divide into Cy5/Cy3 ratio enrichment classes before (left panel) and after IFN $\alpha$  treatment (1000 IU/ml for 1h in Huh7 cells) (right panel). In *A*) STAT2 hybridization data, while in *B*) P-STAT2 hybridization data are shown. Blue column indicate enrichment classes scored as “positive” in our analysis.

C. Histogram representation of Huh7 cells gene expression results at 2, 4 and 8 hours of IFN $\alpha$  treatment (1000 IU/ml) for the 76 TLDA genes divided into classes as indicated. Green columns indicate repressed genes; red columns indicate activated genes.

D. and E. Scatter plots representing the Cy5/Cy3 ratio of each 339 oligonucleotide present in the array before (upper panel) and after (lower panel) IFN $\alpha$  treatment for STAT2 (D) or P-STAT2 (E) hybridization. Red and green spots indicate enriched oligonucleotides corresponding to activated and repressed genes, respectively.

Fig. S2. Position and nucleotide composition analysis of ISREs derived from activated and repressed IFN $\alpha$ /Stat2 direct target genes. Tables summarize the ISRE position and nucleotide composition of activated and repressed ISGs. The ISREs considered are all bound in vivo by Stat2 in Huh7 cells after 1h of IFN $\alpha$  treatment (1000 IU/ml) The sequence logos are a graphical representation of the ISREs nucleic acid multiple sequence alignment and were created through WebLogo 2.8.2 [<http://weblogo.berkeley.edu/>]

Fig. S3. Whole Genome Amplification quality controls. A. ChIP analysis of *ISG15* promoter in Huh7 cells untreated (K) or treated with IFN $\alpha$  1000 IU/ml for 1h. B. Amplicons (left panel) and PCR analysis of *ISG15* promoter (right panel) after the Linear Amplification of chromatin derived from Input and STAT2 and NoAb ChIPs in Huh7 cells untreated or after IFN $\alpha$  stimulation. C. Amplicons (left panel) and PCR analysis of *Isg15* promoter (right panel) after the Linear Amplification of chromatin derived from Input and STAT2+P-STAT2 and STAT2+NoAb ChIPs in Huh7 cells untreated or after IFN $\alpha$  stimulation. See Experimental Procedures section for details. Primers used were: ISG15\_for aggtgttccagggtgttg ISG15\_rev GATGAGTTCGCTGCCTCTCA

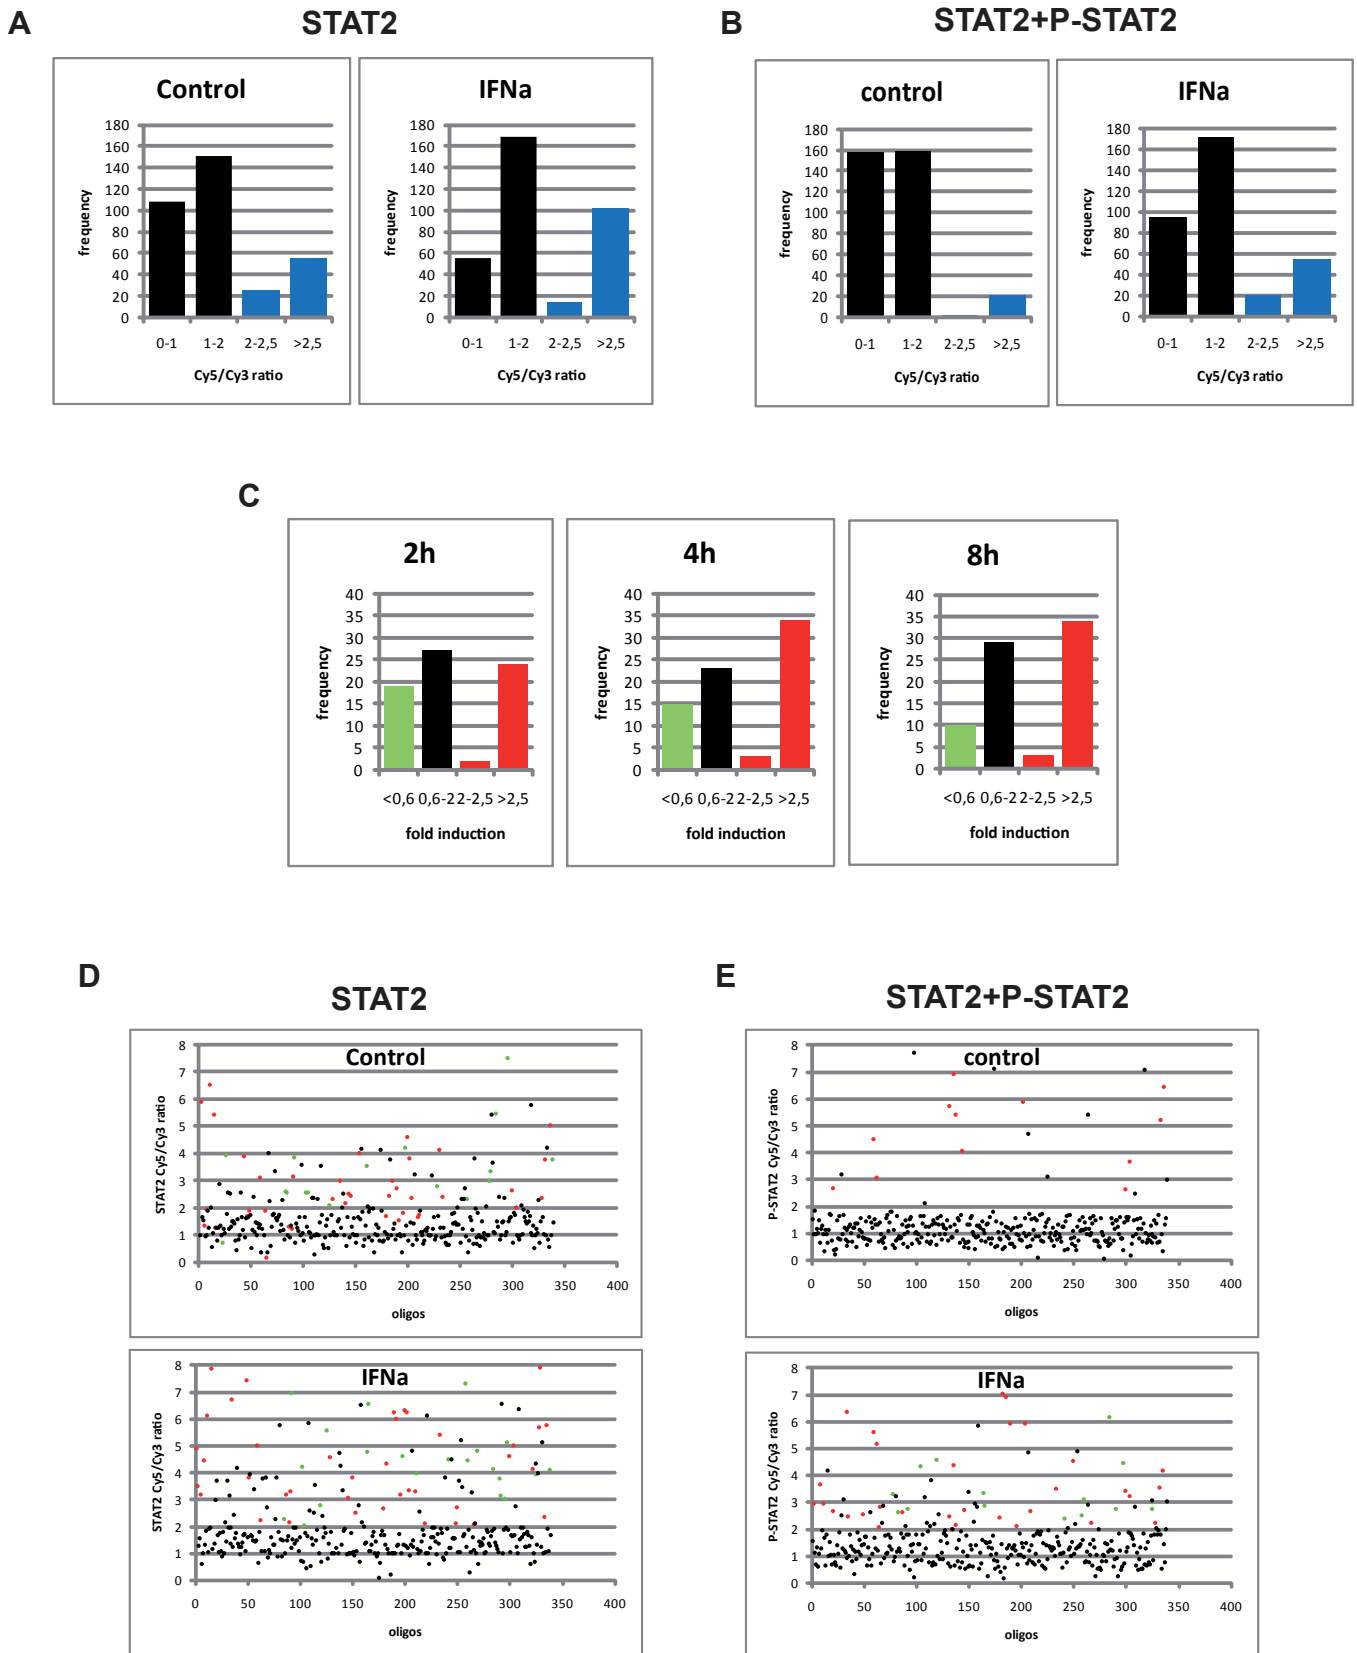

| ACTIVATED              |                                                    |               |                                     |
|------------------------|----------------------------------------------------|---------------|-------------------------------------|
| GENE NAME <sup>a</sup> | ISRE POSITION RESPECT TO PUTATIVE tss <sup>b</sup> | ISRE SEQUENCE | % ADHERENCE TO MATRICE <sup>c</sup> |
| A4GALT                 | -650                                               | ggtttcattttt  | 83,6                                |
| ADAR                   | 0                                                  | gctttcgtttct  | 83,6                                |
| ATF5                   | -370                                               | tctttcccttcc  | 86,8                                |
| BAG3                   | -220                                               | ggtttcggcttc  | 85,9                                |
| BST2                   | -170                                               | agtttcagttcc  | 96,7                                |
| CAV1                   | -680                                               | gatttgactttc  | 85,5                                |
| CXCL10                 | -200                                               | ggtttcactttcc | 97,5                                |
| CXCL11                 | -100                                               | agtttcgttttg  | 85,9                                |
| EIF2AK2 (PKR)          | -50                                                | agtttcggtttcc | 93,4                                |
| ISG15                  | -100                                               | agtttcggtttcc | 94,4                                |
|                        |                                                    | agtttcattttcc | 93,4                                |
| IFI6 (6-16)            | -100                                               | agtttcattttcc | 97,4                                |
| GBP1                   | -100                                               | agtttcatattac | 80,1                                |
| GBP2                   | -130                                               | ggtttctcttaa  | 85,4                                |
| HERC5                  | -150                                               | agtttcctttcc  | 88,7                                |
| IFI16                  | +370 (tra tss e ATG)                               | gttttcactttc  | 95                                  |
| IFI27                  | -90                                                | agtttcggtttcc | 88,3                                |
| IFI35                  | -370                                               | agtttcactcttg | 85                                  |
| IFI44                  | -50                                                | agtttcagtttcc | 88,7                                |
| IFIT1 (ISG56)          | -100                                               | agtttcactttcc | 97,5                                |
| IFIT2 (ISG54)          | -80                                                | agtttcactttcc | 97,5                                |
|                        |                                                    | agtttcactttcc | 90,6                                |
| IFIT3 (RIG-G)          | -100                                               | ggtttcattttcc | 95,6                                |
| IFIT5                  | -100                                               | agtttcagtttct | 85,4                                |
|                        |                                                    | agtttctatttcc | 88,3                                |
| IFITM1                 | -150                                               | cgtttcagtttct | 84,7                                |
| IFITM2                 | +190 (tra tss e ATG)                               | gtttcctctcct  | 83,1                                |
| ISGF3G                 | -70                                                | agtttcagttctc | 85,4                                |
| MNT                    | -330                                               | ggttccgctttcc | 87,4                                |
| LAP3                   | -270                                               | agtttctatttcc | 94                                  |
| MX1                    | -180                                               | tgtttctctttcc | 87,8                                |
| MYD88                  | -80                                                | gctttcgctttcc | 96,2                                |
| OAS1                   | -30                                                | actttcctttgc  | 78,3                                |
| PLEC1                  | -400                                               | actttccattgc  | 80,5                                |
| PLSCR1                 | +20                                                | ggtttcctttcc  | 86,1                                |
| PSME2                  | +10 (tra tss e ATG)                                | gctttcgctttca | 87,4                                |
|                        |                                                    | agtttcgattttt | 80,1                                |
| RSAD2                  | -100                                               | actttcagtttca | 82,8                                |
| SP110                  | -50                                                | actttcacttttc | 97,5                                |
| STAT1                  | +30                                                | agtttcgctttcc | 95                                  |
| STAT2                  | +1000                                              | agtttcagtttcc | 88,7                                |
| TBX1                   | -1600                                              | agcttcccttttc | 83,6                                |
| TNFRSF1B               | -10                                                | gctttcgctttca | 87,4                                |
| TNFSF10                | -120                                               | tctttcagtttcc | 84,9                                |
| UBE2L6                 | -1100                                              | agtttcactgtcg | 84,1                                |
|                        |                                                    | agtttcgctttcc | 86,8                                |
| USP18                  | +60                                                | gctttcgctttcc | 86,4                                |

| RERESSED               |                                                    |               |                                     |
|------------------------|----------------------------------------------------|---------------|-------------------------------------|
| GENE NAME <sup>a</sup> | ISRE POSITION RESPECT TO PUTATIVE tss <sup>b</sup> | ISRE SEQUENCE | % ADHERENCE TO MATRICE <sup>c</sup> |
| BAX                    | -350                                               | ggttttgttttt  | 80,3                                |
| BCR                    | -1000                                              | tgtttcctttcc  | 86,7                                |
| EMID1                  | +870                                               | ggtttcagtttgc | 80,9                                |
| GGA1                   | -500                                               | agtatcactttct | 89,2                                |
| GHDC                   | +500 (tra tss e ATG)                               | aatttcattttc  | 86,8                                |
| GNAZ                   | -600                                               | cctttctgtttgc | 81,1                                |
| HIF1A                  | -300                                               | cctttctctttcc | 88,1                                |
| HNF1a                  | +1080                                              | tatttctcttttg | 80,8                                |
| IL17RA                 | -670                                               | gctttctctttct | 81,3                                |
| NDUFA6                 | -900                                               | actttcccatttc | 83                                  |
|                        |                                                    | tctctcactttcc | 82,4                                |
| PITX2                  | +60                                                | cctttcgctctcc | 83                                  |
|                        |                                                    | tctttccctttc  | 86,6                                |
| POLR3H                 | +400                                               | agtttccattttt | 86,5                                |
|                        |                                                    | ggtttcgctgtga | 80,3                                |
| RBX1                   | +860                                               | aatttgcctttcc | 80,5                                |
| RFC2                   | -550                                               | ggtttcagtttcc | 89,7                                |
|                        |                                                    | ccttttcttttc  | 81,1                                |
| SAMM50                 | -750                                               | gcttcccttttc  | 84,9                                |
| SF3A1                  | -570                                               | tctttcttttttc | 81,8                                |
|                        |                                                    | ggtttgattttcc | 81,7                                |
| SGSM3                  | +440                                               | tctttcactctgc | 82,4                                |
| SLC2A11                | -250                                               | tgtttgacttttg | 83,6                                |
|                        |                                                    | aatttctctttct | 82,1                                |
| SMARCB1                | +110 (tra tss e ATG)                               | ggcttcggtttcc | 80,5                                |
| ST13                   | -1100                                              | tgattcagttttc | 80,8                                |
|                        |                                                    | ggcttcacttttc | 90,6                                |
| TRMU                   | +1100                                              | ccattcgatttgc | 75,5                                |
|                        |                                                    | agtttcctctctg | 95,3                                |
|                        |                                                    | agtttctctttcc | 82,6                                |
| WARS                   | -650                                               | ctgttcgcttttc | 81,1                                |
| ZBED4                  | +2100                                              | gcttttcttttta | 85,9                                |

<sup>a</sup> according to HUGO  
<sup>b</sup> tss = transcription start site  
<sup>c</sup> according to TRANSFAC weight matrices

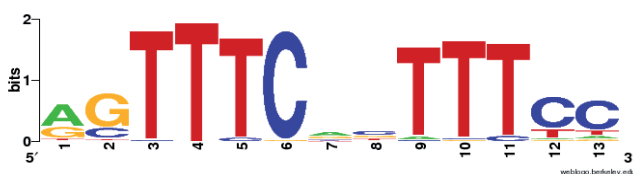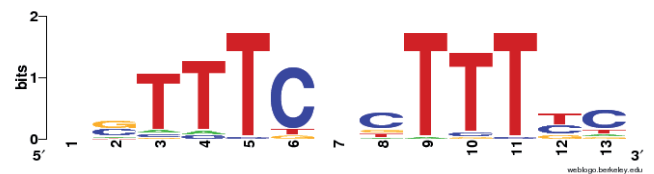

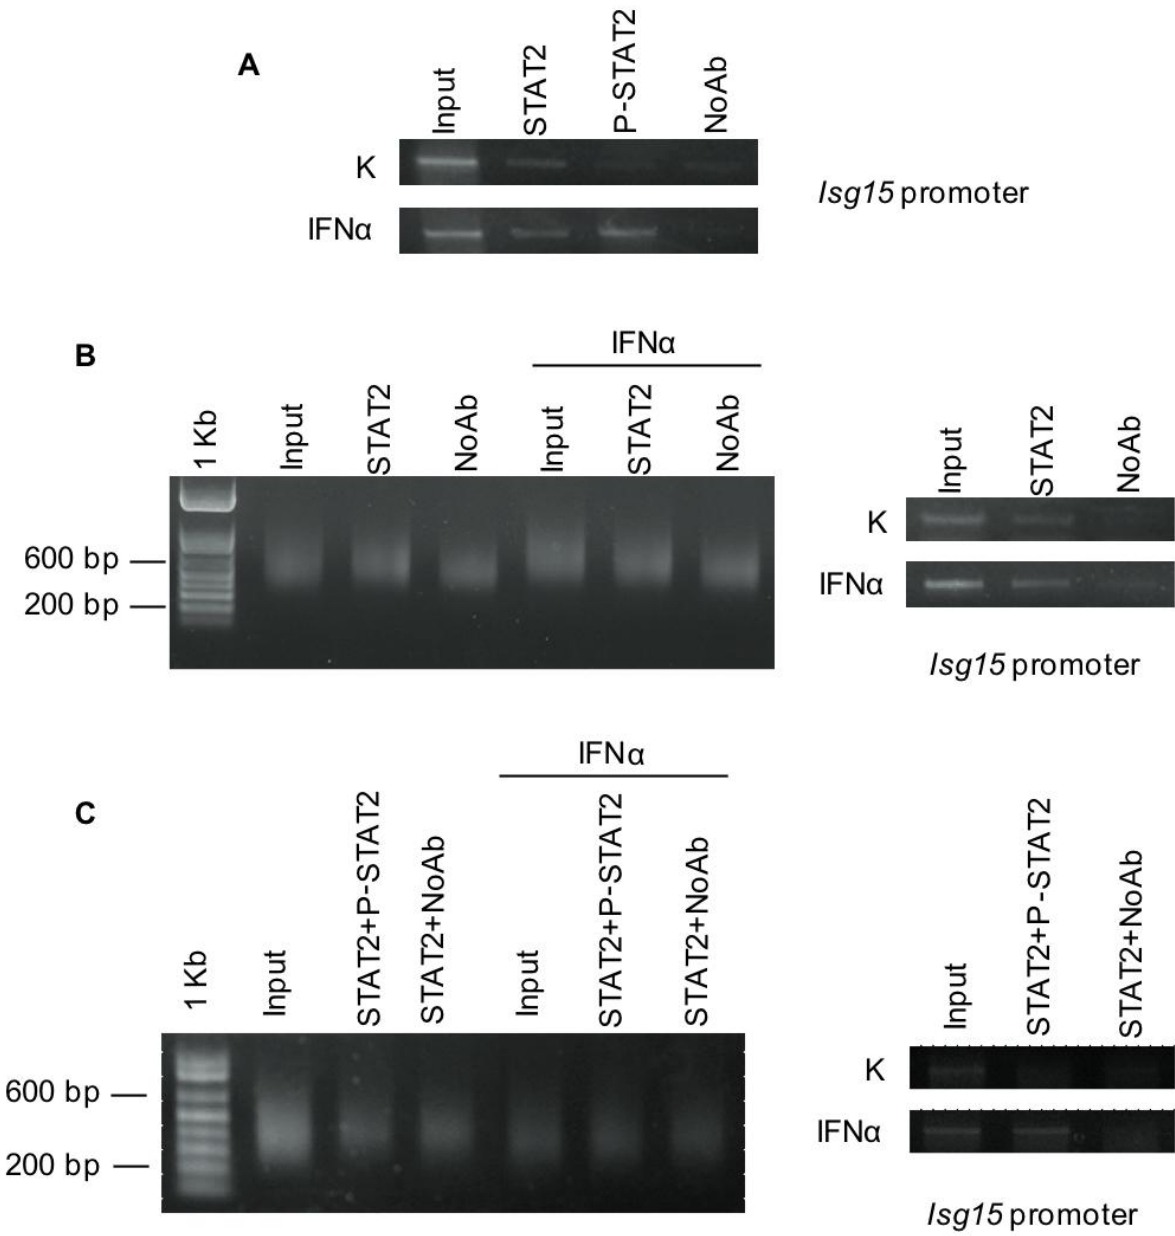

**Table S1.**

List of primers used for Real time PCR analysis

| <b>oligo name</b> | <b>sequence</b>             |
|-------------------|-----------------------------|
| q6-16_for         | TGAGACGTGGGAGGATCCA         |
| q6-16_rev         | AACGGTTCTCCGGCTGAAG         |
| qA4GALT_for       | GGGCGTCAGCACTCAAGAAG        |
| qA4GALT_rev       | CTGGGACAACAAAGACTGCAAA      |
| qAP1G2_for        | TCCCTTCCCCCTTTACATCAG       |
| qAP1G2_rev        | ATCTTTGATCCCCTCCTTCTGTT     |
| qCAV1_for         | CCAGATTCAGGAACAGACAAAATACTT |
| qCAV1_rev         | GGCTGTGAGGAAAGATTTGACTTT    |
| qCXCL10_for       | AAGAGGAGCAGAGGGAAATTCC      |
| qCXCL10_rev       | CCATGTTGCAGACTCGAAGGT       |
| qHERC5_for        | GTGTGTCAGGGTGCCTCCTAGT      |
| qHERC5_rev        | TGGACGGAATGGCTTTTCG         |
| qHIF1a_for        | CACCCCATCTCCTTTCTCTT        |
| qHIF1a_rev        | CGCTCACGTGCTCGTCTGT         |
| qIRF1_for         | CCCTTCGCCGCTAGCTCTA         |
| qIRF1_rev         | GCTGCGTGCCGTCATTTTC         |
| qISG15_for        | AAACCGAAACTGAAGCCAAATTT     |
| qISG15_rev        | CCTATTATAAGCCTGAGGCACACA    |
| qLAP3_for         | CCCACGTTTCCCAGAATTAAGA      |
| qLAP3_rev         | GCGACCTTCGTAATTTTTTTGGA     |
| qLGP1_for         | TCCTGCCTTCTTCCCAATTTTC      |
| qLGP1_rev         | TTCTCCTCCCACGCTCTACTG       |
| qMX1_for          | TCCGTGAATAAAAAGCCAGTGA      |
| qMX1_rev          | TGTCCCAGAGCGTAGAAGAG        |
| qOAS1_for         | TGAAATTCAGCACTGGGATCAG      |
| qOAS1_rev         | GGAGGAGCTGTCTTTGCACTTT      |
| qPITX2_for        | ACGCCTCGTCCCAAACAA          |
| qPITX2_rev        | GGCCCAAGAGACGGAACAA         |
| qRBX1_for         | CGCGGAGTAAAGGGTTTCATT       |
| qRBX1_rev         | CCGGCTTCCTTTTCGTGGTA        |
| qRFC2_for         | ACTCCTGGGCTTAATCGCTCTT      |
| qRFC2_rev         | ACCCCTCTAATCCCAGCACTTT      |
| qSF3A1_for        | GGCAGGAGAATCGCTTGAAC        |
| qSF3A1_rev        | AGTGGCGCGATCTTGACTCT        |
| qST13_for         | CGCCTGCAAGGAAGGTGAT         |
| qST13_rev         | GCGAGCAATTAATCTGATGAACAT    |
| qUSP18_for        | TCAGTGAGGTTCTGGCAGCTT       |
| qUSP18_rev        | CCGTCCCCGCAGCAA             |
| qVIPERIN_for      | CCAGGCATCTGCCACAATG         |
| qVIPERIN_rev      | CACTCAAGAGCTTCCCAGCAA       |
| qWARS_for         | TGACCCCAAGAACTCCTGATCTT     |
| qWARS_rev         | AATTCCCCGCATCTGTTTCAC       |
| qZBED4_for        | CCCTTCTGCTCCCCACTTTT        |
| qZBED4_rev        | GGGATCTGAGGTAAGTGCAGAATG    |

**Table S2.**List of the 113 genes comprised in the IFN $\alpha$ /STAT2 array

| <b>Gene Symbol<sup>a</sup></b>      | <b>Definition<sup>b</sup></b>                                                     | <b>Gene Ontology<sup>c</sup></b> | <b>literature source<sup>d</sup></b> |
|-------------------------------------|-----------------------------------------------------------------------------------|----------------------------------|--------------------------------------|
| <b>A4GALT</b>                       | alpha 1,4-galactosyltransferase                                                   | cell metabolism                  | <b>1</b>                             |
| <b>ADAR</b>                         | adenosine deaminase, RNA-specific                                                 | mRNA processing                  | <b>4</b>                             |
| <b>AP1G2</b><br>G2AD                | adaptor-related protein complex 1, gamma 2 subunit                                | cell metabolism                  | <b>5,6</b>                           |
| <b>ATF5</b><br>ATFX                 | activating transcription factor 5                                                 | transcription                    | <b>3</b>                             |
| <b>BAG3</b>                         | BCL2-associated athanogene 3                                                      | apoptosis/proliferation          | <b>commercial arrays</b>             |
| <b>BAX</b>                          | BCL2-associated X protein                                                         | apoptosis/proliferation          | <b>5</b>                             |
| <b>BCR</b>                          | breakpoint cluster region                                                         | apoptosis/proliferation          | <b>1</b>                             |
| <b>BRCA1</b>                        | breast cancer 1, early onset                                                      | transcription                    | <b>5</b>                             |
| <b>BST1</b><br>CD157                | bone marrow stromal cell antigen 1                                                | immune modulation/host defense   |                                      |
| <b>BST2</b><br>CD137                | bone marrow stromal antigen 2                                                     | immune modulation/host defense   | <b>5</b>                             |
| <b>C1QTNF6</b><br>CTRP6/ ZACRP6     | complement C1q tumor necrosis factor-related 6                                    | immune modulation/host defense   | <b>1</b>                             |
| <b>CABP7</b><br>CALN2               | calcium-binding protein 7                                                         | cell metabolism                  | <b>1</b>                             |
| <b>CAV1</b>                         | caveolin 1, caveolae protein, 22kDa                                               | cell metabolism                  | <b>commercial arrays</b>             |
| <b>CSF2RB</b><br>CD131/ IL3RB/IL5RB | colony stimulating factor 2 receptor, beta, low-affinity (granulocyte-macrophage) | immune modulation/host defense   | <b>1</b>                             |
| <b>CXCL10</b><br>IP-10              | chemokine (C-X-C motif) ligand 10                                                 | immune modulation/host defense   | <b>7</b>                             |
| <b>CXCL11</b><br>H174/I-TAC/IP-9    | chemokine (C-X-C motif) ligand 11                                                 | immune modulation/host defense   |                                      |
| <b>CXCL9</b><br>mig/CMK/humig       | chemokine (C-X-C motif) ligand 9                                                  | immune modulation/host defense   | <b>6</b>                             |
| <b>CYBB</b><br>gp91-phox/CGD/NOX2   | cytochrome b-245, beta polypeptide                                                | immune modulation/host defense   | <b>commercial arrays</b>             |

|                               |                                                                                         |                                    |                          |
|-------------------------------|-----------------------------------------------------------------------------------------|------------------------------------|--------------------------|
| <b>DAD1</b><br>OST2           | defender against cell death 1                                                           | apoptosis/proliferation            | <b>commercial arrays</b> |
| <b>DNp53</b>                  | tumor protein P53, N-truncated                                                          | transcription                      |                          |
| <b>DNp63</b>                  | tumor protein P63, N-truncated                                                          | transcription                      |                          |
| <b>DNp73</b>                  | tumor protein P73, N-truncated                                                          | transcription                      |                          |
| <b>E2F2</b>                   | E2F transcription factor 2                                                              | transcription                      | <b>5</b>                 |
| <b>EIF2AK2</b><br>PKR/EIF2AK1 | eukaryotic translation initiation factor 2-alpha kinase 2                               | immune modulation/host defense     | <b>8</b>                 |
| <b>EMID1</b><br>EMI5/EMU1     | EMI domain-containing protein 1                                                         | cell metabolism                    | <b>1</b>                 |
| <b>GBP1</b>                   | guanylate binding protein 1, interferon-inducible, 67kDa                                | immune modulation/host defense     |                          |
| <b>GBP2</b>                   | guanylate binding protein 2, interferon-inducible                                       | immune modulation/host defense     | <b>6</b>                 |
| <b>GGA1</b>                   | golgi-associated, gamma adaptin ear containing, ARF binding protein 1                   | signal transduction                | <b>1</b>                 |
| <b>GHDC</b><br>LGP1           | GH3 domain containing                                                                   | chromatin remodelling              | <b>3</b>                 |
| <b>GNAZ</b>                   | guanine nucleotide binding protein (G protein), alpha z polypeptide                     | signal transduction                | <b>1</b>                 |
| <b>HDAC10</b>                 | histone deacetylase 10                                                                  | chromatin remodelling              | <b>1</b>                 |
| <b>HERC5</b><br>CEB1          | hect domain and RLD 5                                                                   | Ubiquitination/protein degradation | <b>3</b>                 |
| <b>HIF1A</b><br>MOP1/PASD8    | hypoxia-inducible factor 1, alpha subunit (basic helix-loop-helix transcription factor) | transcription                      | <b>9</b>                 |
| <b>HLA-C</b>                  | major histocompatibility complex, class I, C                                            | immune modulation/host defense     | <b>5</b>                 |
| <b>HLA-E</b>                  | major histocompatibility complex, class I, E                                            | immune modulation/host defense     | <b>5</b>                 |
| <b>HLA-F</b><br>CDA12         | major histocompatibility complex, class I, F                                            | immune modulation/host defense     | <b>6</b>                 |
| <b>HLA-G</b><br>HLA6          | major histocompatibility complex, class I, G                                            | immune modulation/host defense     | <b>6</b>                 |
| <b>HNF1A</b>                  | HNF1 homeobox A                                                                         | transcription                      | <b>commercial arrays</b> |
| <b>HNF4A</b>                  | hepatocyte nuclear factor 4, alpha                                                      | transcription                      |                          |



|                                         |                                                             |                                |               |
|-----------------------------------------|-------------------------------------------------------------|--------------------------------|---------------|
| <b>IFI16</b><br>PYHIN2/IFNGIP1          | interferon gamma inducible protein 16                       | immune modulation/host defense | <b>10</b>     |
| <b>IFI27</b><br>ISG12                   | interferon, alpha-inducible protein 27                      | apoptosis/proliferation        | <b>5, 11</b>  |
| <b>IFI35</b>                            | interferon-induced protein 35                               | immune modulation/host defense | <b>5</b>      |
| <b>IFI44</b><br>HCV associated p44      | interferon-induced protein 44                               | immune modulation/host defense | <b>5,6</b>    |
| <b>IFI6</b><br>G1P3/6-16                | interferon, alpha-inducible protein 6                       | immune modulation/host defense | <b>2,3</b>    |
| <b>IFIT1</b><br>ISG56                   | interferon-induced protein with tetratricopeptide repeats 1 | immune modulation/host defense | <b>3, 12</b>  |
| <b>IFIT2</b><br>ISG54/IFI54/isg42/G10P2 | interferon-induced protein with tetratricopeptide repeats 2 | immune modulation/host defense | <b>13, 14</b> |
| <b>IFIT3</b><br>RIG-G/ISG60/ IRG2/cig49 | interferon-induced protein with tetratricopeptide repeats 3 | immune modulation/host defense | <b>15</b>     |
| <b>IFIT5</b><br>RI58                    | interferon-induced protein with tetratricopeptide repeats 5 | immune modulation/host defense |               |
| <b>IFITM1</b><br>9-27/IFI17             | interferon induced transmembrane protein 1 (9-27)           | immune modulation/host defense | <b>2,3</b>    |
| <b>IFITM2</b><br>1-8D                   | interferon induced transmembrane protein 2(1-8D)            | immune modulation/host defense | <b>11</b>     |
| <b>IFITM3</b><br>1-8U                   | interferon induced transmembrane protein 3(1-8U)            | immune modulation/host defense | <b>11</b>     |
| <b>IFNA1</b>                            | interferon, alpha 1                                         | immune modulation/host defense |               |
| <b>IFNA4</b>                            | interferon, alpha 4                                         | immune modulation/host defense |               |
| <b>IFNB1</b>                            | interferon, beta 1                                          | immune modulation/host defense |               |
| <b>IL17RA</b>                           | interleukin-17 receptor A                                   | immune modulation/host defense | <b>1</b>      |
| <b>IL8</b><br>CXCL8                     | interleukin 8                                               | immune modulation/host defense |               |
| <b>IRF1</b>                             | IFN regulatory factor 1                                     | transcription                  |               |
| <b>IRF2</b>                             | IFN regulatory factor 2                                     | transcription                  | <b>6</b>      |
| <b>IRF3</b>                             | IFN regulatory factor 3                                     | transcription                  |               |
| <b>IRF7</b>                             | IFN regulatory factor 7                                     | transcription                  | <b>16</b>     |
| <b>IRF9</b><br>p48/ISGF3G               | interferon regulatory factor 9                              | transcription                  | <b>5</b>      |

|                                                          |                                                                                    |                                    |                          |
|----------------------------------------------------------|------------------------------------------------------------------------------------|------------------------------------|--------------------------|
| <b>ISG15</b><br>IFI15/G1P2/UCRP                          | ISG15 ubiquitin-like modifier                                                      | Ubiquitination/protein degradation | <b>3, 17</b>             |
| <b>LAP3</b><br>PEPS/LAPEP                                | leucine aminopeptidase 3                                                           | apoptosis/proliferation            | <b>3</b>                 |
| <b>MET</b><br>HGFR/RCCP2                                 | met proto-oncogene (hepatocyte growth factor receptor)                             | apoptosis/proliferation            | <b>5</b>                 |
| <b>MNT</b><br>MAD6, MXD6, ROX, bHLHd3                    | MAX binding protein                                                                | apoptosis/proliferation            | <b>commercial arrays</b> |
| <b>MX1</b><br>MXA                                        | myxovirus (influenza virus) resistance 1, interferon-inducible protein p78 (mouse) | immune modulation/host defense     | <b>3, 18</b>             |
| <b>MX2</b><br>MXB                                        | myxovirus (influenza virus) resistance 2 (mouse)                                   | immune modulation/host defense     | <b>19</b>                |
| <b>MYD88</b>                                             | Myeloid differential primary response gene (88)                                    | immune modulation/host defense     | <b>commercial arrays</b> |
| <b>NCF1</b><br>p47(phox)/NOXO2                           | neutrophil cytosolic factor 1                                                      | immune modulation/host defense     | <b>commercial arrays</b> |
| <b>NDUFA6</b><br>B14/CI-B14/NADHB14                      | NADH dehydrogenase (ubiquinone) 1 alpha subcomplex, 6, 14kDa                       | signal transduction                | <b>1</b>                 |
| <b>NFAM1</b>                                             | NFAT activating protein with ITAM motif 1                                          | immune modulation/host defense     | <b>1</b>                 |
| <b>OAS1</b><br>IFI4                                      | 2'-5' oligoadenylate synthetases (2-5A)                                            | immune modulation/host defense     | <b>1</b>                 |
| <b>PARVB</b><br>CGI-56/affixin                           | parvin, beta                                                                       | cytoskeleton                       | <b>1</b>                 |
| <b>PITX2</b>                                             | paired-like homeodomain 2                                                          | transcription                      |                          |
| <b>PLEC</b><br>HD1/PCN                                   | plectin                                                                            | cytoskeleton                       | <b>5</b>                 |
| <b>PLSCR1</b>                                            | phospholipid scramblase 1                                                          | cell metabolism                    | <b>5, 20, 21</b>         |
| <b>PNN</b><br>PININ/DRS                                  | pinin, desmosome associated protein                                                | mRNA processing                    | <b>6</b>                 |
| <b>POLR3H</b><br>RPC8                                    | polymerase (RNA) III (DNA directed) polypeptide H (22.9kD)                         | Transcription                      | <b>1</b>                 |
| <b>PPARA</b><br>NR1C1                                    | peroxisome proliferator-activated receptor alpha                                   | transcription                      | <b>1</b>                 |
| <b>PSME1</b><br>IFI5111/PA28A/MGC8628/REGalpha/PA28alpha | proteasome (prosome, macropain) activator subunit 1 (PA28 alpha)                   | cell metabolism                    | <b>5</b>                 |
| <b>PSME2</b><br>PA28 beta                                | proteasome (prosome, macropain) activator subunit 1 (PA28 beta)                    | Ubiquitination/protein degradation | <b>commercial arrays</b> |
| <b>PVALB</b>                                             | parvalbumin                                                                        | cell metabolism                    | <b>1</b>                 |

|                                   |                                                                                         |                                    |                          |
|-----------------------------------|-----------------------------------------------------------------------------------------|------------------------------------|--------------------------|
| <b>RASD2</b><br>Rhes/TEM2         | RASD family, member 2                                                                   | signal transduction                | <b>1</b>                 |
| <b>RBX1</b><br>ROC1/DDB/CUL4      | RING-box 1                                                                              | Ubiquitination/protein degradation | <b>1</b>                 |
| <b>RFC2</b><br>RFC40              | replication factor C (activator 1) 2, 40kDa                                             | DNA replication                    | <b>5</b>                 |
| <b>RFPL3</b>                      | Ret finger protein-like 3                                                               | signal transduction                | <b>1</b>                 |
| <b>RSAD2</b><br>VIPERIN/CIG5/vig1 | radical S-adenosyl methionine domain containing 2                                       | immune modulation/host defense     | <b>6</b>                 |
| <b>SAMM50</b><br>SAM50            | sorting and assembly machinery component 50 homolog ( <i>S. cerevisiae</i> )            | signal transduction                | <b>1</b>                 |
| <b>SEC14L4</b><br>TAP3            | SEC14-like 4 ( <i>S. cerevisiae</i> )                                                   | cell metabolism                    | <b>1</b>                 |
| <b>SF3A1</b>                      | splicing factor 3a, subunit 1, 120kDa                                                   | mRNA processing                    | <b>1</b>                 |
| <b>SGSM3</b><br>RUTBC3            | small G protein signaling modulator 3                                                   | apoptosis/proliferation            | <b>1</b>                 |
| <b>SLC25A1</b><br>CIC             | solute carrier family 25 (mitochondrial carrier; citrate transporter), member 1         | cell metabolism                    | <b>1</b>                 |
| <b>SLC2A11</b><br>GLUT11          | solute carrier family 2 (facilitated glucose transporter), member 11                    | cell metabolism                    | <b>1</b>                 |
| <b>SLC5A1</b><br>NAGT/SGLT1       | solute carrier family 5 (sodium/glucose cotransporter), member 1                        | cell metabolism                    | <b>1</b>                 |
| <b>SMARCB1</b><br>INI1/BAF47      | SWI/SNF related, matrix associated, actin dependent regulator of chromatin subfamily B1 | chromatin remodelling              | <b>1</b>                 |
| <b>SP110</b><br>IFI75/IFI41       | SP110 nuclear body protein                                                              | immune modulation/host defense     | <b>11</b>                |
| <b>SSTR3</b>                      | somatostatin receptor 3                                                                 | signal transduction                | <b>1</b>                 |
| <b>ST13</b><br>HIP/HOP            | solute carrier family 5 (sodium/glucose cotransporter), member 1                        | signal transduction                | <b>1</b>                 |
| <b>STAT1</b>                      | transducer and activator of transcription 1, 91kDa                                      | transcription                      | <b>5,6</b>               |
| <b>STAT2</b>                      | transducer and activator of transcription 2, 113 kDa                                    | transcription                      | <b>6</b>                 |
| <b>TBX1</b>                       | T-box 1                                                                                 | Transcription                      | <b>1</b>                 |
| <b>TCN2</b>                       | transcobalamin II                                                                       | cell metabolism                    | <b>commercial arrays</b> |
| <b>TNFRSF1B</b><br>CD120b         | tumor necrosis factor receptor superfamily, member 1B                                   | immune modulation/host defense     | <b>22</b>                |

|                                     |                                                            |                                    |             |
|-------------------------------------|------------------------------------------------------------|------------------------------------|-------------|
| <b>TNFSF10</b><br>TRAIL/APO2L/CD253 | tumor necrosis factor (ligand) superfamily, member 10      | apoptosis/proliferation            | <b>5</b>    |
| <b>TP53</b>                         | tumor protein p53                                          | transcription                      |             |
| <b>TP63</b>                         | tumor protein p63                                          | transcription                      |             |
| <b>TP73</b>                         | tumor protein p73                                          | Transcription                      |             |
| <b>TRMU</b><br>TRMT1                | tRNA 5-methylaminomethyl-2-thiouridylate methyltransferase | Transcription                      | <b>1</b>    |
| <b>TUBGCP6</b>                      | gamma-tubulin complex componenet 6                         | cytoskeleton                       | <b>1</b>    |
| <b>UBE2L6</b><br>UBCH8/RIG-B        | ubiquitin-conjugating enzyme E2L 6                         | Ubiquitination/protein degradation | <b>5</b>    |
| <b>USP18</b><br>UBP43/ISG43         | ubiquitin specific peptidase 18                            | Ubiquitination/protein degradation | <b>1, 3</b> |
| <b>WARS</b><br>hWRS/IFI53/IFP53     | tryptophanyl-tRNA synthetase                               | signal transduction                |             |
| <b>ZBED4</b>                        | zinc finger BED domain-containing protein 4                | Transcription                      | <b>1</b>    |

<sup>a,b</sup>Gene Symbol and Definition according to HUGO

<sup>c</sup>Gene Ontology category to which the gene has been assigned

<sup>d</sup>List of the source literature references:

- 1) Hartman SE et al, Genes & Dev (2005)19:2953-68
- 2) Imam et al,NAR (1990)18(22):6573
- 3) Chen et al, Gastroenterology (2005)128:1435-54
- 4) Patterson et al, Virol.(1995) 210(2):508-11
- 5) Radaeva et al, Gastroenterology (2002)122:1020-69
- 6) Helbig et al, Hepatology (2005) 42:702-10
- 7) Veckman V et al, Virology (2006)345:96-104
- 8) Ward et al,Virology (2003) 313:553-66
- 9) Der SD et al, PNAS (1998) 95(26):15623-8
- 10) Dawson MJ et al, J.Cell Biochem (1995)57(1):39-51
- 11)Zhu et al, Hepatology (2003) 37:1180-88
- 12) Grandvaux et al, J.Virol (2002) 76(11):5532-9
- 13) Levyet al, PNAS (1986)83:8929-33
- 14) Kessler et al,PNAS(1988)85:8521-25
- 15) Yu Man et al,PNAS(1997)94:7406-11
- 16) Lu R et al, JBC (2000)275:31805-12
- 17) Reich et al,PNAS(1987)84:6394-98
- 18) Ronni T et al, J.Int. Cyt. Res (1998) 18(9):773-8
- 19) Aebi et al, MCB (1989)9(11)5062-72
- 20) Zhou et al,Blood(2000)95(8):2593-9
- 21) Zhao et al,JBC(2005)280(52):42707-14
- 22) Santee et al,JBC (1996)35:21151-59
- 23) Frolova et al, Gene (1993) 128(2):237-45

**Table S3.**List of the oligonucleotides spotted on the IFN $\alpha$ /STAT2 array

| Gene symbol <sup>a</sup>         | RefSeq    | oligo 1 (-1500 / -500) <sup>b</sup> |      | oligo 2 (-500 / 0) <sup>b</sup> |      | oligo 3 (0 / +1000) <sup>b</sup> |
|----------------------------------|-----------|-------------------------------------|------|---------------------------------|------|----------------------------------|
| <b>A4GALT</b>                    | NM_017436 | from -1170 to -1120                 | 806  | from -314 to -268               | 1137 | from +869 to +915                |
| <b>ADAR1</b>                     | NM_001111 | from -1265 to -1215                 | 1110 | from -105 to -60                | 793  | from +733 to +783                |
| <b>AP1G2/G2AD</b>                | NM_003917 | from -825 to -755                   | 596  | from -159 to -111               | 1080 | from +969 to +1019               |
| <b>ATF5/ATFX</b>                 | NM_012068 | from -1094 to -1044                 | 741  | from -303 to -253               | 672  | from +419 to +469                |
| <b>BAG3</b>                      | NM_004281 | from -1092 to -1042                 | 767  | from -275 to -229               | 659  | from +430 to +479                |
| <b>BAX</b>                       | NM_004324 | from -905 to -859                   | 634  | from -225 to -175               | 934  | from +759 to +809                |
| <b>BCR</b>                       | NM_004327 | from -1083 to -1033                 | 900  | from -133 to -83                | 1145 | from +1062 to +1112              |
| <b>BRCA1</b>                     | NM_007295 | from -990 to -940                   | 698  | from -242 to -192               | 984  | from +792 to +842                |
| <b>BST1/ CD157</b>               | NM_004334 | from -1078 to -1028                 | 899  | from -129 to -79                | 887  | from +808 to +858                |
| <b>BST2</b>                      | NM_004335 | from -751 to -701                   | 535  | from -166 to -116               | 974  | from +858 to +908                |
| <b>C1QTNF6/CTRP6/ ZACRP6</b>     | NM_031910 | from -1085 to -1035                 | 811  | from -224 to -174               | 798  | from -624 to + 674               |
| <b>CABP7</b>                     | NM_182527 | from -798 to -751                   | 830  | from +79 to +126                | 665  | from +791 to +834                |
| <b>CAV1</b>                      | NM_001753 | from -1199 to -1149                 | 946  | from -203 to -158               | 945  | from +787 to +837                |
| <b>CSF2RB/CD131/ IL3RB/IL5RB</b> | NM_000395 | from -1098 to -1048                 | 807  | from -241 to -193               | 552  | from +359 to +407                |
| <b>CXCL10/IP-10</b>              | NM_001565 | from -1138 to -1088                 | 971  | from -117 to -67                | 503  | from +436 to +485                |
| <b>CXCL11/H174/I-TAC/IP-9</b>    | NM_005409 | from -1030 to -980                  | 685  | from -295 to -245               | 1057 | from +812 to +862                |
| <b>CXCL9/mig/CMK/humig</b>       | NM_002416 | from -1072 to -1024                 | 748  | from -276 to -228               | 991  | from +763 to +812                |
| <b>CYBB/gp91-phox/CGD/ NOX2</b>  | NM_000397 | from -978 to -928                   | 868  | from -60 to -15                 | 820  | from +805 to +855                |
| <b>DAD1</b>                      | NM_001344 | from -897 to -847                   | 587  | from -260 to -210               | 728  | from +518 to +568                |
| <b>DNp53</b>                     | NM_000546 | from -1404 to -1354                 | 1140 | from -214 to -164               | 611  | from +447 to +497                |
| <b>DNp63</b>                     | NM_003722 | from -1291 to -1241                 | 1063 | from -178 to -129               | 1050 | from +921 to +971                |
| <b>DNp73</b>                     | NM_005427 | from -1010 to -960                  | 771  | from -189 to -141               | 881  | from +740 to +790                |
| <b>E2F2</b>                      | NM_004091 | from -1063 to -1013                 | 814  | from -199 to -148               | 1140 | from +992 to +1042               |
| <b>EIF2AK2/PKR/EIF2AK1/PRKR</b>  | NM_002759 | from -1460 to -1410                 | 1048 | from -362 to -312               | 1031 | from +719 to +769                |
| <b>EMID1/EMI5/EMU1</b>           | NM_133455 | from -1053 to -1003                 | 715  | from -288 to -239               | 999  | from +760 to +810                |
| <b>GBP1</b>                      | NM_002053 | from -1080 to -1030                 | 853  | from -177 to -27                | 692  | from +665 to +715                |
| <b>GBP2</b>                      | NM_004120 | from -1018 to -968                  | 728  | from -240 to -190               | 621  | from +431 to +480                |
| <b>GGA1</b>                      | NM_013365 | from -967 to -917                   | 667  | from -250 to -200               | 1185 | from +985 to +1035               |
| <b>GHDC/LGP1</b>                 | NM_032484 | from -1221 to -1171                 | 1028 | from -143 to -84                | 1289 | from +1205 to +1255              |
| <b>GNAZ</b>                      | NM_002073 | from -1191 to -1141                 | 802  | from -339 to -291               | 961  | from +670 to +720                |

|                                               |              |                     |      |                   |      |                     |
|-----------------------------------------------|--------------|---------------------|------|-------------------|------|---------------------|
| <b>HDAC10</b>                                 | NM_032019    | from -526 to -476   | 776  | from +300 to +350 | 788  | from +1138 to +1188 |
| <b>HERC5/CEB1</b>                             | NM_016323    | from -1039 to -989  | 785  | from -204 to -154 | 961  | from +807 to +856   |
| <b>HIF-1A/MOP1/ PASD8</b>                     | NM_001530    | from -1356 to -1307 | 1123 | from -184 to -134 | 1030 | from +896 to +942   |
| <b>HLA-C</b>                                  | NM_002117    | from -960 to -910   | 742  | from -168 to -118 | 559  | from +441 to +491   |
| <b>HLA-E</b>                                  | NM_005516    | from -1049 to -999  | 862  | from -137 to +87  | 881  | from +968 to +1017  |
| <b>HLA-F/CDA12</b>                            | NM_018950    | from -1070 to -1020 | 837  | from -183 to -103 | 980  | from +877 to +927   |
| <b>HLA-G/HLA6</b>                             | NM_002127    | from -1103 to -1054 | 819  | from -235 to -185 | 1072 | from +887 to +937   |
| <b>HNF1A</b>                                  | NM_000545    | from -1341 to -1291 | 1047 | from -244 to -194 | 917  | from +723 to +773   |
| <b>HNF4A</b>                                  | NM_000457    | from -1080 to -1030 | 721  | from -309 to -259 | 871  | from +612 to +662   |
| <b>IFI16/PYHIN2/ IFNGIP1</b>                  | NM_005531    | from -1304 to -1254 | 1037 | from -217 to -167 | 748  | from +581 to +631   |
| <b>IFI27/ISG12</b>                            | NM_005532    | from -1232 to -1182 | 1189 | from +7 to +57    | 543  | from +600 to +650   |
| <b>IFI35</b>                                  | NM_005533    | from -1220 to -1170 | 902  | from -268 to -218 | 810  | from +592 to +642   |
| <b>IFI44/HCV associated p44</b>               | NM_006417    | from -1088 to -1038 | 913  | from -125 to -75  | 644  | from +569 to +619   |
| <b>IFI6/6-16/G1P3</b>                         | NM_002038    | from -1009 to -959  | 855  | from -104 to -54  | 943  | from +889 to +939   |
| <b>IFI75/IFI41/SP110</b>                      | NM_004509    | from -1132 to -1082 | 785  | from -297 to -247 | 865  | from +618 to +668   |
| <b>IFIT1/ISG56</b>                            | NM_001001887 | from -1057 to -1007 | 904  | from -103 to -53  | 771  | from +718 to +768   |
| <b>IFIT2/ISG54/IFI54/ cig42/GARG39/ G10P2</b> | NM_001547    | from -1153 to -1104 | 926  | from -178 to -128 | 868  | from +740 to +788   |
| <b>IFIT3/RIG-GISG60/ IRG2/cig49/GARG49</b>    | NM_001031683 | from -863 to -816   | 616  | from -200 to -150 | 779  | from +629 to +678   |
| <b>IFIT5/RI58</b>                             | NM_012420    | from -1069 to -1019 | 831  | from -188 to -138 | 926  | from +788 to +838   |
| <b>IFITM1/9-27/IFI17/ CD225/LEU13</b>         | NM_003641    | from -1190 to -1140 | 934  | from -206 to -156 | 616  | from +460 to +510   |
| <b>IFITM2/1-8D</b>                            | NM_006435    | from -1272 to -1222 | 992  | from -230 to -180 | 803  | from +623 to +672   |
| <b>IFITM3/1-8U</b>                            | NM_021034    | from -1744 to -1699 | 1417 | from -282 to -233 | 1014 | from +781 to +831   |
| <b>IFNA1</b>                                  | NM_024013    | from -707 to -657   | 583  | from -74 to -24   | 562  | from +538 to +588   |
| <b>IFNA4</b>                                  | NM_021068    | from -856 to -806   | 605  | from -201 to -151 | 774  | from +623 to +673   |
| <b>IFNB1</b>                                  | NM_002176    | from -905 to -855   | 770  | from -85 to -35   | 600  | from +565 to +615   |
| <b>IL17R</b>                                  | NM_014339    | from -916 to -866   | 717  | from -149 to -99  | 619  | from +520 to +570   |
| <b>IL8</b>                                    | NM_000584    | from -1085 to -1035 | 884  | from -151 to -104 | 960  | from +856 to +906   |
| <b>IRF1</b>                                   | NM_002198    | from -839 to -789   | 711  | from -78 to -28   | 877  | from +849 to +899   |
| <b>IRF2</b>                                   | NM_002199    | from -1038 to -988  | 831  | from -157 to -109 | 900  | from +791 to +841   |
| <b>IRF3</b>                                   | NM_001571    | from -1089 to -1039 | 776  | from -263 to -213 | 971  | from +758 to +808   |
| <b>IRF7/IRF7A/IRF-7H</b>                      | NM_001572    | from -1368 to -1318 | 1223 | from -95 to -48   | 1277 | from +1229 to +1274 |
| <b>ISG15/IFI15/G1P2/UCRP</b>                  | NM_005101    | from -1226 to -1181 | 1024 | from -157 to -111 | 812  | from +701 to +751   |
| <b>ISGF3G/p48/IRF9</b>                        | NM_006084    | from -1175 to -1125 | 929  | from -196 to -146 | 876  | from +730 to +780   |

|                                                                      |              |                     |      |                   |      |                     |
|----------------------------------------------------------------------|--------------|---------------------|------|-------------------|------|---------------------|
| <b>LAP3/PEPS/LAPEP</b>                                               | NM_015907    | from -1123 to -1073 | 762  | from -311 to -266 | 954  | from +688 to +738   |
| <b>MET/HGFR/RCCP2</b>                                                | NM_000245    | from -716 to -666   | 814  | from +148 to +198 | 544  | from +742 to +792   |
| <b>MNT</b>                                                           | NM_020310    | from -1025 to -975  | 834  | from -141 to -93  | 1022 | from +929 to +977   |
| <b>MX1/MXA</b>                                                       | NM_002462    | from -1066 to -1016 | 782  | from -234 to -185 | 1075 | from +890 to +940   |
| <b>MX2/MXB</b>                                                       | NM_002463    | from -1020 to -970  | 825  | from -145 to -95  | 1050 | from +955 to +1005  |
| <b>MYD88</b>                                                         | NM_002468    | from -999 to -949   | 747  | from -202 to -157 | 864  | from +707 to +757   |
| <b>NCF1/p47(phox)/ NOXO2</b>                                         | NM_000265    | from -921 to -871   | 662  | from -209 to -160 | 1031 | from +871 to +921   |
| <b>NDUFA6/B14/Ci-B14/ NADHB14</b>                                    | NM_002490    | from -1246 to -1196 | 1097 | from -99 to -49   | 1016 | from +967 to +1017  |
| <b>NFAM1</b>                                                         | NM_145912    | from -1270 to -1220 | 1047 | from -173 to -123 | 763  | from +640 to +690   |
| <b>OAS1/IFI4</b>                                                     | NM_001032409 | from -1155 to -1105 | 956  | from -149 to -99  | 725  | from +626 to +676   |
| <b>PARVB/CGI-56/affixin</b>                                          | NM_001003828 | from -1039 to -990  | 759  | from -231 to -181 | 787  | from +606 to +656   |
| <b>PITX2</b>                                                         | NM_153426    | from -992 to -942   | 738  | from -204 to -154 | 991  | from +837 to +887   |
| <b>PLEC/HD1/PCN/EBS1/ EBSO/PLTN</b>                                  | NM_000445    | from -1180 to -1130 | 879  | from -251 to -202 | 709  | from +507 to +557   |
| <b>PLSCR1</b>                                                        | NM_021105    | from -853 to -803   | 623  | from -180 to -130 | 994  | from +864 to +914   |
| <b>PNN/PININ/DRS/SDK3</b>                                            | NM_002687    | from -989 to -939   | 711  | from -228 to -178 | 859  | from +681 to +731   |
| <b>POLR3H/RPC8</b>                                                   | NM_001018050 | from -1056 to -1006 | 761  | from -245 to -200 | 899  | from +699 to +744   |
| <b>PPARA/NR1C1</b>                                                   | NM_001001928 | from -649 to -599   | 857  | from +258 to +308 | 958  | from +1266 to +1316 |
| <b>PSME1/IEFSSP5111/PA28A; IFI5111; MGC8628; REGalpha; PA28alpha</b> | NM_006263    | from -1190 to -1140 | 835  | from -305 to -258 | 1007 | from +749 to + 799  |
| <b>PSME2</b>                                                         | NM_002818    | from -747 to -697   | 553  | from -144 to -94  | 967  | from +873 to +923   |
| <b>PVALB</b>                                                         | NM_002854    | from -1320 to -1270 | 1061 | from -209 to -159 | 922  | from +763 to +813   |
| <b>RASD2/Rhes/TEM2</b>                                               | NM_014310    | from -1302 to -1252 | 942  | from -310 to -260 | 949  | from +689 to +739   |
| <b>RBX1/ROC1/RNF75</b>                                               | NM_014248    | from -1366 to -1316 | 997  | from -319 to -270 | 933  | from +663 to +713   |
| <b>RFC2</b>                                                          | NM_002914    | from -1061 to -1011 | 765  | from -246 to -201 | 993  | from +792 to +842   |
| <b>RFPL3</b>                                                         | NM_006604    | from -1172 to -1122 | 825  | from -297 to -250 | 787  | from +537 to +587   |
| <b>RSAD2/VIPERIN/CIG5/vig1</b>                                       | NM_080657    | from -900 to -850   | 730  | from -120 to -70  | 974  | from +904 to +954   |
| <b>SAMM50/OMP85/TOB55/TRG-3/SAM50</b>                                | NM_015380    | from -1270 to -1220 | 883  | from -337 to -289 | 1061 | from +772 to +822   |
| <b>SEC14L4/TAP3</b>                                                  | NM_174977    | from -997 to -947   | 693  | from -254 to -206 | 1069 | from +863 to +913   |
| <b>SF3A1/PRP21/ PRPF21/SAP114</b>                                    | NM_001005409 | from -1049 to -999  | 795  | from -204 to -160 | 665  | from +505 to +555   |
| <b>SGSM3/RUTBC3/MAP/RUSC3</b>                                        | NM_015705    | from -1073 to -1023 | 807  | from -216 to -166 | 931  | from +765 to +815   |
| <b>SLC25A1</b>                                                       | NM_005984    | from -1119 to -1069 | 814  | from -255 to -205 | 911  | from +706 to +754   |

|                                                                               |                        |                     |      |                   |      |                     |
|-------------------------------------------------------------------------------|------------------------|---------------------|------|-------------------|------|---------------------|
| <b>SLC2A11</b>                                                                | NM_030807              | from -1008 to -958  | 820  | from -138 to -88  | 946  | from +858 to +908   |
| <b>SLC5A1/NAGT/SGLT1</b>                                                      | NM_000343              | from -1187 to -1137 | 943  | from -194 to -144 | 1006 | from +862 to +912   |
| <b>SMARCB1/RDT/INI1/SNF5/Snr1/BAF47/Sfh1p/hSNFS/SNF5L1</b>                    | NM_001007468           | from -1059 to -1009 | 823  | from -186 to -136 | 852  | from +716 to +766   |
| <b>SSTR3</b>                                                                  | NM_001051              | from -862 to -812   | 719  | from -93 to -44   | 893  | from +849 to +899   |
| <b>ST13/HIP7HOP/P48/ AAG2/SNC6/HSPABP</b>                                     | NM_003932              | from -859 to -809   | 649  | from -160 to -110 | 1037 | from +927 to +977   |
| <b>STAT1</b>                                                                  | NM_007315              | from -967 to -917   | 700  | from -217 to -167 | 1203 | from +1036 to +1086 |
| <b>STAT2</b>                                                                  | NM_005419              | from -1232 to -1182 | 878  | from -304 to -259 | 938  | from +679 to +729   |
| <b>TAp53</b>                                                                  | NM_000546              | from -1199 to -1149 | 991  | from -158 to -108 | 888  | from +780 to +830   |
| <b>TAp63</b>                                                                  | NM_003722              | from -1185 to -1135 | 898  | from -237 to -187 | 913  | from +726 to +776   |
| <b>TAp73</b>                                                                  | NM_005427              | from -1317 to -1268 | 1023 | from -245 to -195 | 905  | from +710 to +760   |
| <b>TBX1/DGS/TGA/CAFS/CTHM/DGCR/DORV/VCFS/TBX1C</b>                            | NM_005992              | from -937 to -887   | 702  | from -185 to -135 | 661  | from +526 to +576   |
| <b>TCN2/TC2</b>                                                               | NM_000355              | from -1123 to -1073 | 907  | from -166 to -116 | 862  | from +746 to +796   |
| <b>TNFRSF1B/CD120b/p75/TBPII/TNFBR/TNFR2/ TNFR80/TNF-R75/p75TNFR/TNF-R-II</b> | NM_001066              | from -776 to -726   | 545  | from -181 to -131 | 1030 | from +899 to +949   |
| <b>TNFSF10/TRAIL/APO2L/CD253</b>                                              | NM_003810              | from -1005 to -955  | 831  | from -124 to -74  | 613  | from +539 to +589   |
| <b>TRMU/TRMT1</b>                                                             | NM_017722              | from -1266 to -1216 | 943  | from -273 to -225 | 879  | from +654 to +700   |
| <b>TUBGCP6</b>                                                                | NM_001008658           | from -1277 to -1227 | 1025 | from -202 to -152 | 880  | from +728 to +778   |
| <b>UBE2L6/UBCH8/RIG-B</b>                                                     | NM_004223              | from -1138 to -1088 | 772  | from -316 to -263 | 983  | from +720 to +770   |
| <b>USP18/UBP43/ISG43</b>                                                      | NM_017414              | from -1307 to -1257 | 1034 | from -223 to -176 | 674  | from +498 to +543   |
| <b>WARS/WARS/IFI53/ IFP53</b>                                                 | NM_004184<br>NM_173701 | from -1123 to -1073 | 823  | from -250 to -200 | 1071 | from +871 to +921   |
| <b>ZBED4</b>                                                                  | NM_014838              | from -1247 to -1197 | 824  | from -373 to -324 | 1072 | from +748 to +798   |

<sup>a</sup>Gene Symbol according to HUGO

<sup>b</sup>Oligonucleotide position respect to transcription start site (indicated with 0)



**Table S4.**

IFN $\alpha$ /STAT2 array ChIP-chip results

| Gene Name <sup>a</sup> | IFN $\alpha$ <sup>b</sup> | STAT2 <sup>c</sup>   |     |     | P-STAT2 <sup>c</sup> |                      |     | expression in Huh7 after IFN $\alpha$ <sup>d</sup> |                      | expression in PHH after IFN $\alpha$ <sup>d</sup> |    |
|------------------------|---------------------------|----------------------|-----|-----|----------------------|----------------------|-----|----------------------------------------------------|----------------------|---------------------------------------------------|----|
|                        |                           | oligo n <sup>o</sup> | -   | +   | oligo n <sup>o</sup> | oligo n <sup>o</sup> | -   | +                                                  | oligo n <sup>o</sup> |                                                   |    |
| A4GALT                 |                           | 2                    | pos | pos | 2                    |                      | neg | pos                                                | 2                    | ↑                                                 | ↑  |
| ADAR                   |                           | 2                    | pos | pos | 2                    |                      | neg | pos                                                | 2                    | ↑                                                 | ↑  |
| AP1G2                  |                           | 3                    | pos | pos | 3                    |                      | neg | pos                                                | 3                    | NC                                                | ↓  |
| ATF5                   |                           |                      | neg | pos | 2                    |                      | neg | neg                                                |                      | ↑                                                 | NC |
| BAG3                   |                           | 2                    | pos | pos | 1,2                  | 2                    | pos | pos                                                | 2                    | NC                                                | ↓  |
| BAX                    |                           |                      | neg | neg |                      |                      | neg | neg                                                |                      | ↓                                                 | NC |
| BCR                    |                           | 2                    | pos | neg |                      |                      | neg | neg                                                |                      | ↓                                                 | ↓  |
| BRCA1                  |                           | 1,3                  | pos | pos | 1,3                  | 1                    | pos | pos                                                | 1                    | NC                                                | ↓  |
| BST1                   |                           |                      | neg | pos | 2                    |                      | neg | neg                                                |                      | NE                                                | ↑  |
| BST2                   |                           |                      | neg | pos | 1,2                  |                      | neg | pos                                                | 1,2                  | ↑                                                 | ↑  |
| C1QTNF6                |                           |                      | neg | pos | 1                    |                      | neg | neg                                                |                      |                                                   |    |
| CABP7                  |                           | 1                    | pos | pos | 1                    |                      | neg | neg                                                |                      |                                                   |    |
| CAV1                   |                           | 1                    | pos | neg |                      |                      | neg | neg                                                |                      | ↑                                                 | ↑  |
| CSF2RB                 |                           |                      | neg | pos | 2                    |                      | neg | pos                                                | 2                    | NE                                                | ↑  |
| CXCL10                 |                           | 2                    | pos | pos | 2                    | 2                    | pos | pos                                                | 2                    | ↑                                                 | ↑  |
| CXCL11                 |                           | 2                    | pos | pos | 2                    | 2                    | pos | pos                                                | 2                    | ↑                                                 | ↑  |
| CXCL9                  |                           |                      | neg | pos | 1,2                  |                      | neg | pos                                                | 1,2                  | NC                                                | ↑  |
| CYBB                   |                           | 2                    | pos | pos | 2                    | 2                    | pos | neg                                                |                      | NE                                                | ↑  |
| DAD1                   |                           | 1,2                  | pos | pos | 1,2                  |                      | neg | pos                                                | 1,2                  | NC                                                | ↑  |
| DNp53                  |                           |                      | neg | neg |                      |                      | neg | neg                                                |                      |                                                   |    |
| DNp63                  |                           | 1                    | pos | pos | 1                    |                      | neg | neg                                                |                      |                                                   |    |
| DNp73                  |                           |                      | neg | pos | 1,2                  |                      | neg | pos                                                | 2                    |                                                   |    |
| E2F2                   |                           | 2                    | pos | pos | 2                    |                      | neg | pos                                                | 2                    | NE                                                | NE |
| EIF2AK2                |                           | 1                    | pos | neg |                      |                      | neg | neg                                                |                      | ↑                                                 | ↑  |
| EMID1                  |                           | 2,3                  | pos | pos | 2,3                  |                      | neg | pos                                                | 2                    | ↓                                                 | NC |
| GBP1                   |                           |                      | neg | pos | 2                    |                      | neg | pos                                                | 2                    | ↑                                                 | ↑  |
| GBP2                   |                           | 3                    | pos | pos | 2,3                  |                      | neg | pos                                                | 2                    | ↑                                                 | ↑  |
| GGA1                   |                           | 1,2                  | pos | pos | 2                    |                      | neg | pos                                                | 2                    | ↓                                                 | ↓  |
| GHDC                   |                           | 2                    | pos | pos | 2                    |                      | neg | neg                                                |                      | ↓                                                 | ↑  |
| GNAZ                   |                           |                      | neg | neg |                      |                      | neg | neg                                                |                      | ↓                                                 | ↓  |
| HDAC10                 |                           | 3                    | pos | pos | 3                    |                      | neg | neg                                                |                      | ↓                                                 | ↑  |
| HERC5                  |                           |                      | neg | pos | 1,3                  |                      | neg | neg                                                |                      | ↑                                                 | ↑  |
| HIF1a                  |                           | 2                    | pos | neg |                      |                      | neg | pos                                                | 2                    | ↓                                                 | ↑  |
| HLA-C                  |                           | 3                    | pos | pos | 3                    | 3                    | pos | pos                                                | 3                    |                                                   |    |
| HLA-E                  |                           | 2                    | pos | pos | 2                    |                      | neg | pos                                                | 2                    |                                                   |    |
| HLA-F                  |                           | 3                    | pos | pos | 2,3                  |                      | neg | pos                                                | 2,3                  |                                                   |    |
| HLA-G                  |                           | 3                    | pos | pos | 3                    |                      | neg | pos                                                | 3                    |                                                   |    |
| HNF1A                  |                           |                      | neg | pos | 2                    |                      | neg | pos                                                | 2                    | ↓                                                 | ↓  |
| HNF4a                  |                           |                      | neg | pos | 1                    |                      | neg | pos                                                | 1                    |                                                   |    |
| IFI16                  |                           | 2                    | pos | pos | 2                    |                      | neg | neg                                                |                      | ↑                                                 | ↑  |
| IFI27                  |                           | 2,3                  | pos | pos | 2                    |                      | neg | pos                                                | 2                    | ↑                                                 | ↑  |
| IFI35                  |                           | 2                    | pos | pos | 2                    | 2                    | pos | pos                                                | 2                    | ↑                                                 | ↑  |
| IFI44                  |                           | 3                    | pos | pos | 1,3                  | 3                    | pos | pos                                                | 1,3                  | ↑                                                 | ↑  |
| IFI6/6-16              |                           | 2                    | pos | pos | 1,2                  |                      | neg | pos                                                | 2                    | ↑                                                 | ↑  |
| IFI75                  |                           | 2                    | pos | pos | 2                    |                      | neg | neg                                                |                      | ↑                                                 | ↑  |

|             |  |     |     |     |     |  |   |     |     |     |  |  |    |  |  |    |
|-------------|--|-----|-----|-----|-----|--|---|-----|-----|-----|--|--|----|--|--|----|
| IFIT1       |  |     | neg | pos | 2   |  |   | neg | pos | 2   |  |  | ↑  |  |  | ↑  |
| IFIT2       |  | 3   | pos | pos | 3   |  |   | neg | pos | 3   |  |  | ↑  |  |  | ↑  |
| IFIT3       |  |     | neg | neg |     |  |   | neg | neg |     |  |  | ↑  |  |  | ↑  |
| IFIT5       |  | 2   | pos | pos | 2   |  | 2 | pos | neg |     |  |  | ↑  |  |  | ↑  |
| IFITM1/9-27 |  |     | neg | pos | 2   |  |   | neg | neg |     |  |  | ↑  |  |  | ↑  |
| IFITM2      |  | 1   | pos | pos | 1   |  |   | neg | pos | 1   |  |  | ↑  |  |  | ↑  |
| IFITM3      |  |     | neg | pos | 3   |  |   | neg | pos | 3   |  |  |    |  |  |    |
| IFNA1       |  | 3   | pos | pos | 3   |  |   | neg | neg |     |  |  |    |  |  |    |
| IFNA4       |  | 2   | pos | pos | 2,3 |  |   | neg | pos | 2   |  |  |    |  |  |    |
| IFNB1       |  |     | neg | pos | 2,3 |  |   | neg | pos | 2   |  |  |    |  |  |    |
| IL17RA      |  | 1   | pos | pos | 1   |  |   | neg | neg |     |  |  | ↓  |  |  | ↓  |
| IL8         |  | 3   | pos | pos | 2,3 |  |   | neg | pos | 2,3 |  |  | ↓  |  |  | ↑  |
| IRF1        |  |     | neg | neg |     |  |   | neg | neg |     |  |  |    |  |  |    |
| IRF2        |  |     | neg | neg |     |  |   | neg | neg |     |  |  |    |  |  |    |
| IRF3        |  | 3   | pos | neg |     |  | 3 | pos | neg |     |  |  |    |  |  |    |
| IRF7        |  |     | neg | neg |     |  |   | neg | neg |     |  |  |    |  |  |    |
| IRF9        |  |     | neg | pos | 2   |  |   | neg | pos | 2   |  |  | ↑  |  |  | ↑  |
| ISG15       |  | 2   | pos | pos | 2   |  |   | neg | pos | 2   |  |  | ↑  |  |  | ↑  |
| LAP3        |  |     | neg | pos | 3   |  |   | neg | pos | 3   |  |  | ↑  |  |  | ↑  |
| MET         |  | 1   | pos | pos | 1   |  |   | neg | neg |     |  |  | NC |  |  | ↑  |
| MNT         |  | 1,3 | pos | pos | 1,3 |  | 3 | pos | neg |     |  |  | ↑  |  |  | NC |
| MX1         |  | 2   | pos | pos | 1,2 |  |   | neg | pos | 2   |  |  | ↑  |  |  | ↑  |
| MX2         |  | 2   | pos | pos | 2   |  | 2 | pos | pos | 2   |  |  | NC |  |  | ↑  |
| MYD88       |  |     | neg | pos | 2,3 |  |   | neg | pos | 2   |  |  | ↑  |  |  | ↑  |
| NCF1        |  |     | neg | pos | 2   |  |   | neg | pos | 2   |  |  | NE |  |  | ↑  |
| NDUFA6      |  |     | neg | pos | 1   |  |   | neg | pos | 1   |  |  | ↓  |  |  | ↑  |
| NFAM1       |  |     | neg | pos | 1   |  |   | neg | pos | 1   |  |  |    |  |  |    |
| OAS1        |  |     | neg | pos | 2   |  |   | neg | pos | 2   |  |  | ↑  |  |  | ↑  |
| PARVB       |  | 1,3 | pos | neg |     |  | 3 | pos | neg |     |  |  |    |  |  |    |
| PITX2       |  | 3   | pos | neg |     |  |   | neg | neg |     |  |  | ↓  |  |  | ↓  |
| PLEC        |  | 2   | pos | pos | 2   |  |   | neg | pos | 2   |  |  | ↑  |  |  | NC |
| PLSCR1      |  |     | neg | neg |     |  |   | neg | neg |     |  |  | ↑  |  |  | ↑  |
| PNN         |  |     | neg | pos | 1   |  |   | neg | pos | 1   |  |  | NC |  |  | NC |
| POLR3H      |  |     | neg | pos | 1   |  |   | neg | pos | 1   |  |  | ↓  |  |  | NC |
| PPARA       |  |     | neg | pos | 1   |  |   | neg | pos | 1   |  |  |    |  |  |    |
| PSME1       |  | 2,3 | pos | pos | 2,3 |  | 2 | pos | pos | 2   |  |  | NC |  |  | NC |
| PSME2       |  | 3   | pos | pos | 2,3 |  |   | neg | pos | 2,3 |  |  | ↑  |  |  | ↑  |
| PVALB       |  | 2   | pos | pos | 2   |  |   | neg | pos | 2   |  |  |    |  |  |    |
| RASD2       |  | 1,2 | pos | pos | 1,2 |  |   | neg | pos | 1,2 |  |  | NE |  |  | ↑  |
| RBX1        |  | 1   | pos | pos | 2   |  |   | neg | pos | 2   |  |  | ↓  |  |  | ↑  |
| RFC2        |  |     | neg | pos | 1   |  |   | neg | pos | 1   |  |  | ↓  |  |  | ↓  |
| RFPL3       |  | 2   | pos | pos | 2   |  | 2 | pos | pos | 2   |  |  |    |  |  |    |
| RSAD2       |  | 3   | pos | pos | 2   |  | 3 | pos | pos | 2   |  |  | ↑  |  |  | ↑  |
| SAMM50      |  |     | neg | neg |     |  |   | neg | neg |     |  |  | ↓  |  |  | NC |
| SEC14L4     |  | 2   | pos | neg |     |  |   | neg | neg |     |  |  |    |  |  |    |
| SF3A1       |  | 2,3 | pos | neg |     |  |   | neg | neg |     |  |  | ↓  |  |  | ↓  |
| SGSM3       |  |     | neg | pos | 2   |  |   | neg | pos | 2   |  |  | ↓  |  |  | ↑  |
| SLC25A1     |  | 1,2 | pos | neg |     |  |   | neg | neg |     |  |  | NC |  |  | ↓  |
| SLC2A11     |  | 2   | pos | pos | 2   |  |   | neg | pos | 2   |  |  | ↓  |  |  | ↑  |
| SLC5A1      |  | 2   | pos | neg |     |  |   | neg | neg |     |  |  | NE |  |  | ↓  |
| SMARCB1     |  |     | neg | pos | 2,3 |  |   | neg | pos | 2   |  |  | ↓  |  |  | NC |
| SSTR3       |  | 1   | pos | pos | 1   |  |   | neg | neg |     |  |  |    |  |  |    |
| ST13        |  | 1   | pos | pos | 1,3 |  |   | neg | pos | 3   |  |  | ↓  |  |  | ↓  |

|                 |  |     |     |     |     |  |   |     |     |     |  |   |  |    |
|-----------------|--|-----|-----|-----|-----|--|---|-----|-----|-----|--|---|--|----|
| <b>STAT1</b>    |  | 2   | pos | pos | 2   |  | 2 | pos | pos | 2   |  | ↑ |  | ↑  |
| <b>STAT2</b>    |  | 3   | pos | pos | 3   |  | 3 | pos | pos | 3   |  | ↑ |  | ↑  |
| <b>TAp53</b>    |  |     | neg | pos | 3   |  |   | neg | neg |     |  |   |  |    |
| <b>TAp63</b>    |  | 2   | pos | pos | 2   |  | 2 | pos | pos | 2   |  |   |  |    |
| <b>TAp73</b>    |  |     | neg | neg |     |  |   | neg | neg |     |  |   |  |    |
| <b>TBX1</b>     |  |     | neg | neg |     |  |   | neg | neg |     |  | ↑ |  | ↑  |
| <b>TCN2</b>     |  | 2   | pos | neg |     |  | 2 | pos | neg |     |  |   |  |    |
| <b>TNFRSF1B</b> |  |     | neg | neg |     |  |   | neg | neg |     |  | ↑ |  | NC |
| <b>TNFSF10</b>  |  |     | neg | pos | 3   |  |   | neg | pos | 3   |  | ↑ |  | ↑  |
| <b>TRMU</b>     |  |     | neg | pos | 3   |  |   | neg | pos | 3   |  | ↓ |  | ↓  |
| <b>TUBGCP6</b>  |  | 1   | pos | pos | 1,3 |  |   | neg | pos | 1   |  |   |  |    |
| <b>UBE2L6</b>   |  | 1   | pos | pos | 1,2 |  |   | neg | pos | 1,2 |  | ↑ |  | ↑  |
| <b>USP18</b>    |  | 1,3 | pos | pos | 1,3 |  | 3 | pos | pos | 3   |  | ↑ |  | ↑  |
| <b>WARS</b>     |  | 1,2 | pos | pos | 2   |  |   | neg | neg |     |  | ↓ |  | ↑  |
| <b>ZBED4</b>    |  | 2,3 | pos | pos | 3   |  | 3 | pos | pos | 3   |  | ↓ |  | ↓  |

<sup>a</sup>Gene Symbol according to HUGO

<sup>b</sup>Huh7 cells were left untreated or treated with 1000 IU/ml of IFN $\alpha$  for 1h

<sup>c</sup>Stat2 or P-Stat2 occupancy on indicated oligonucleotides (see Experimental Procedures for Data Analysis information)

<sup>d</sup>Gene expression in Huh7 cells or Primary Human Hepatocytes (PHH) after IFN $\alpha$  treatment (see Experimental Procedures and Table S5 for details)

**Table S5.**

Taqman® Low Density Array analysis results

| Gene name <sup>a</sup> | Huh7 <sup>b</sup> |        |        |  | PHH <sup>b</sup> |        |        |
|------------------------|-------------------|--------|--------|--|------------------|--------|--------|
|                        | IFN 2h            | IFN 4h | IFN 8h |  | IFN 2h           | IFN 4h | IFN 8h |
| <i>A4galt</i>          | 2,8               | 2,2    | 4,9    |  | 1,5              | 1,6    | 1,7    |
| <i>Adar</i>            | 1                 | 1,5    | 2      |  | 1,1              | 1      | 2,4    |
| <i>Ap1g2</i>           | 0,6               | 0,8    | 0,7    |  | 0,5              | 0,6    | 1,3    |
| <i>Atf5</i>            | 1,3               | 1,2    | 2      |  | 1,3              | 0,8    | 1      |
| <i>Bag3</i>            | 1,1               | 2,7    | 1,5    |  | 1                | 0,7    | 0,4    |
| <i>Bax</i>             | 0,6               | 0,5    | 1      |  | 0,9              | 1,1    | 1,3    |
| <i>Bcr</i>             | 0,5               | 0,7    | 0,9    |  | 0,8              | 1      | 0,4    |
| <i>Brca1</i>           | 0,7               | 0,6    | 1,6    |  | 0,7              | 0,8    | 0,3    |
| <i>Bst2</i>            | 42,2              | 150    | 139    |  | 1,3              | 1,1    | 2,9    |
| <i>Cav1</i>            | 10,3              | 16,2   | 32     |  | 2,3              | 3,2    | 2,5    |
| <i>Cxcl10</i>          | 12,1              | 24,5   | 40     |  | 219              | 351    | 361    |
| <i>Cxcl11</i>          | 4,8               | 5,2    | 19     |  | 2694             | 2276   | 3595   |
| <i>Cxcl9</i>           | 1,4               | 1,2    | 1,1    |  | 22,5             | 32,5   | 29     |
| <i>Dad1</i>            | 0,9               | 0,8    | 0,8    |  | 2,3              | 1,9    | 1,6    |
| <i>Eif2ak2/Pkr</i>     | 2,8               | 7,1    | 8,7    |  | 5,9              | 6,1    | 11,6   |
| <i>Emid1</i>           | 0,4               | 0,5    | 0,2    |  | 1,1              | 2,5    | 0,6    |
| <i>Gbp1</i>            | 5,7               | 12,1   | 13,7   |  | 8,4              | 5,1    | 13,5   |
| <i>Gbp2</i>            | 1,8               | 2,6    | 1,8    |  | 2,6              | 2,6    | 1,9    |
| <i>Gga1</i>            | 0,5               | 1      | 0,9    |  | 0,6              | 0,7    | 0,5    |
| <i>Ghdc/Lgp1</i>       | 0,4               | 0,2    | 0,1    |  | 1,7              | 3,1    | 2,1    |
| <i>Gnaz</i>            | 1                 | 0,7    | 0,5    |  | 0,8              | 1,2    | 0,4    |
| <i>Hdac10</i>          | 0,3               | 0,3    | 0,4    |  | 3,1              | 4,6    | 7,7    |
| <i>Herc5/Ceb1</i>      | 16,9              | 22,9   | 47     |  | 62,5             | 41,5   | 88,5   |
| <i>Hif1a</i>           | 0,6               | 0,5    | 0,6    |  | 2,8              | 5      | 2,5    |
| <i>Hnf1a</i>           | 0,7               | 0,5    | 0,7    |  | 0,5              | 0,8    | 1,2    |
| <i>Ifi16</i>           | 0                 | 0      | 70     |  | 10,5             | 20,9   | 18,8   |
| <i>Ifi27</i>           | 0                 | 28,8   | 9,1    |  | 3,1              | 1,4    | 17,9   |
| <i>Ifi35</i>           | 1,2               | 4,9    | 5,7    |  | 2,6              | 1,2    | 7,2    |
| <i>Ifi44</i>           | 0                 | 53     | 28,3   |  | 106,3            | 53,1   | 187,9  |
| <i>Ifi6/6-16</i>       | 12,2              | 44,5   | 50,6   |  | 6,4              | 3,3    | 13,6   |
| <i>Ifit1/ISG56</i>     | 402               | 1127   | 710,4  |  | 2423             | 1510   | 3663   |
| <i>Ifit2/Isq54</i>     | 124               | 361    | 93,6   |  | 66,3             | 70     | 77     |
| <i>Ifit3/Rig-g</i>     | 44,7              | 104,6  | 69,4   |  | 26,1             | 34,3   | 33,3   |
| <i>Ifit5</i>           | 14,1              | 37,6   | 22,6   |  | 2,8              | 0,6    | 2,2    |
| <i>Ifitm1/9-27</i>     | 44,6              | 110    | 138    |  | 6                | 3,3    | 21     |
| <i>Ifitm2/1-8D</i>     | 0,9               | 1,1    | 1,52   |  | 1,7              | 1,1    | 2,1    |
| <i>Il17ra</i>          | 0,3               | 2,3    | 1      |  | 0,8              | 0,8    | 0,6    |
| <i>Il8</i>             | 0,3               | 0,6    | 1,7    |  | 0,8              | 5      | 6      |
| <i>Irf9</i>            | 5,5               | 12,3   | 8,6    |  | 1,9              | 1      | 4,6    |
| <i>Isq15</i>           | 50,5              | 66,3   | 108    |  | 18,2             | 15,7   | 57     |

|                        |      |      |       |      |       |      |
|------------------------|------|------|-------|------|-------|------|
| <i>Lap3</i>            | 1,1  | 2,4  | 2,9   | 7    | 3,1   | 12,9 |
| <i>Met</i>             | 0,9  | 0,7  | 1     | 2,6  | 3,8   | 3,4  |
| <i>Mnt</i>             | 6,7  | 4    | 4     | 0,8  | 1,3   | 1,7  |
| <i>Mx1</i>             | 204  | 527  | 741   | 14,2 | 15    | 25,9 |
| <i>Mx2</i>             | 1    | 0,9  | 1,2   | 12,3 | 12,4  | 34,7 |
| <i>Myd88</i>           | 1,5  | 2,5  | 1,9   | 2,8  | 1,7   | 4,3  |
| <i>Ndufa6</i>          | 0,6  | 0,8  | 0,7   | 1    | 2,2   | 1    |
| <i>Oas1</i>            | 90   | 283  | 268   | 9,6  | 5,4   | 23,7 |
| <i>Pitx2</i>           | 0,3  | 0,2  | 0,2   | 0,2  | 0,006 | 0,8  |
| <i>Plec</i>            | 2,2  | 1,8  | 1,4   | 0,7  | 1,3   | 1,7  |
| <i>Plscr1</i>          | 3,7  | 10,7 | 11,8  | 4,6  | 3,1   | 9,2  |
| <i>Pnn</i>             | 0,9  | 0,9  | 0,8   | 0,7  | 1,4   | 0,9  |
| <i>Polr3h</i>          | 0,3  | 0,8  | 0,8   | 1    | 0,7   | 1,8  |
| <i>Psme1/Ifi5111</i>   | 0,8  | 1,4  | 1,3   | 1,2  | 0,8   | 1,4  |
| <i>Psme2</i>           | 1,4  | 2,6  | 2     | 1    | 1,2   | 2,2  |
| <i>Rbx1</i>            | 0,8  | 0,7  | 0,8   | 1,3  | 1,7   | 1,7  |
| <i>Rfc2</i>            | 0,3  | 1    | 0,8   | 0,6  | 1,3   | 0,8  |
| <i>Rsad2/Viperin</i>   | 125  | 1103 | 837   | 453  | 224   | 892  |
| <i>Samm50</i>          | 0,5  | 0,8  | 0,5   | 0,8  | 1,1   | 0,9  |
| <i>Sf3a1</i>           | 0,7  | 0,6  | 0,7   | 0,5  | 0,6   | 0,7  |
| <i>Sgsm3/Rutbc3</i>    | 0,7  | 0,3  | 0,7   | 0,9  | 2,1   | 1,6  |
| <i>Slc25a1</i>         | 1    | 1,1  | 1     | 0,6  | 0,8   | 0,7  |
| <i>Slc2a11</i>         | 1    | 0,3  | 0,7   | 0,9  | 2,7   | 7,4  |
| <i>SmarcbB1</i>        | 0,7  | 0,7  | 0,6   | 1,7  | 1,5   | 1,1  |
| <i>Sp110/Ifi75</i>     | 0,3  | 15,3 | 17,2  | 8    | 3,8   | 15,5 |
| <i>St13</i>            | 0,6  | 0,6  | 0,8   | 0,8  | 1,5   | 0,7  |
| <i>Stat1</i>           | 2,3  | 4,2  | 4,8   | 5,4  | 4,7   | 8,7  |
| <i>Stat2</i>           | 1,4  | 2,6  | 3,8   | 5,7  | 1,6   | 6,6  |
| <i>Tbx1</i>            | 0    | 174  | 85,2  | 43,7 | 20    | 16,4 |
| <i>Tnfrsf1b/Cd120b</i> | 0,6  | 1,2  | 3,6   | 0,9  | 1,3   | 0,8  |
| <i>Tnfsf10/Trail</i>   | 55,5 | 162  | 151,8 | 49,5 | 25,2  | 61,5 |
| <i>Trmu/Trmt1</i>      | 0,6  | 0,4  | 0,3   | 0,5  | 0,6   | 0,7  |
| <i>Ube2l6</i>          | 10,8 | 14   | 14    | 2,3  | 0,8   | 2,1  |
| <i>Usp18</i>           | 21,8 | 37,9 | 83,6  | 23,4 | 11    | 46,8 |
| <i>Wars</i>            | 0,8  | 0,6  | 0,5   | 9,1  | 2,2   | 11,8 |
| <i>Zbed4</i>           | 0,8  | 1,5  | 0,7   | 0,3  | 0,1   | 0,2  |

<sup>a</sup>Gene Symbol according to HUGO

<sup>b</sup>Huh7 cells and Primary Human Hepatocytes (PHH) were left untreated or treated with 1000 IU/ml of IFN $\alpha$  for the indicated time points. Expression values represent relative enrichment over control untreated cells. 18s was used as internal calibrator for equal loading of samples (see Experimental Procedures for details)
